# Supplementary material for: Mutant Proteomics of Lung Adenocarcinomas Harboring Different EGFR Mutations
Source: PubMed Central journal article supplement (PMC7477350; doi:10.3389/fonc.2020.01494), 2020-08-25
Supplement: Data_Sheet_3.pdf [file Data_Sheet_3.pdf]

# **Supplementary Information File 3**

## **Mutant Proteomics of Lung Adenocarcinomas Harboring Different EGFR Mutations**

Toshihide Nishimura, Ákos Végvári, Haruhiko Nakamura, Harubumi Kato, Hisashi Saji

Figure S1

A

GO Biological Process

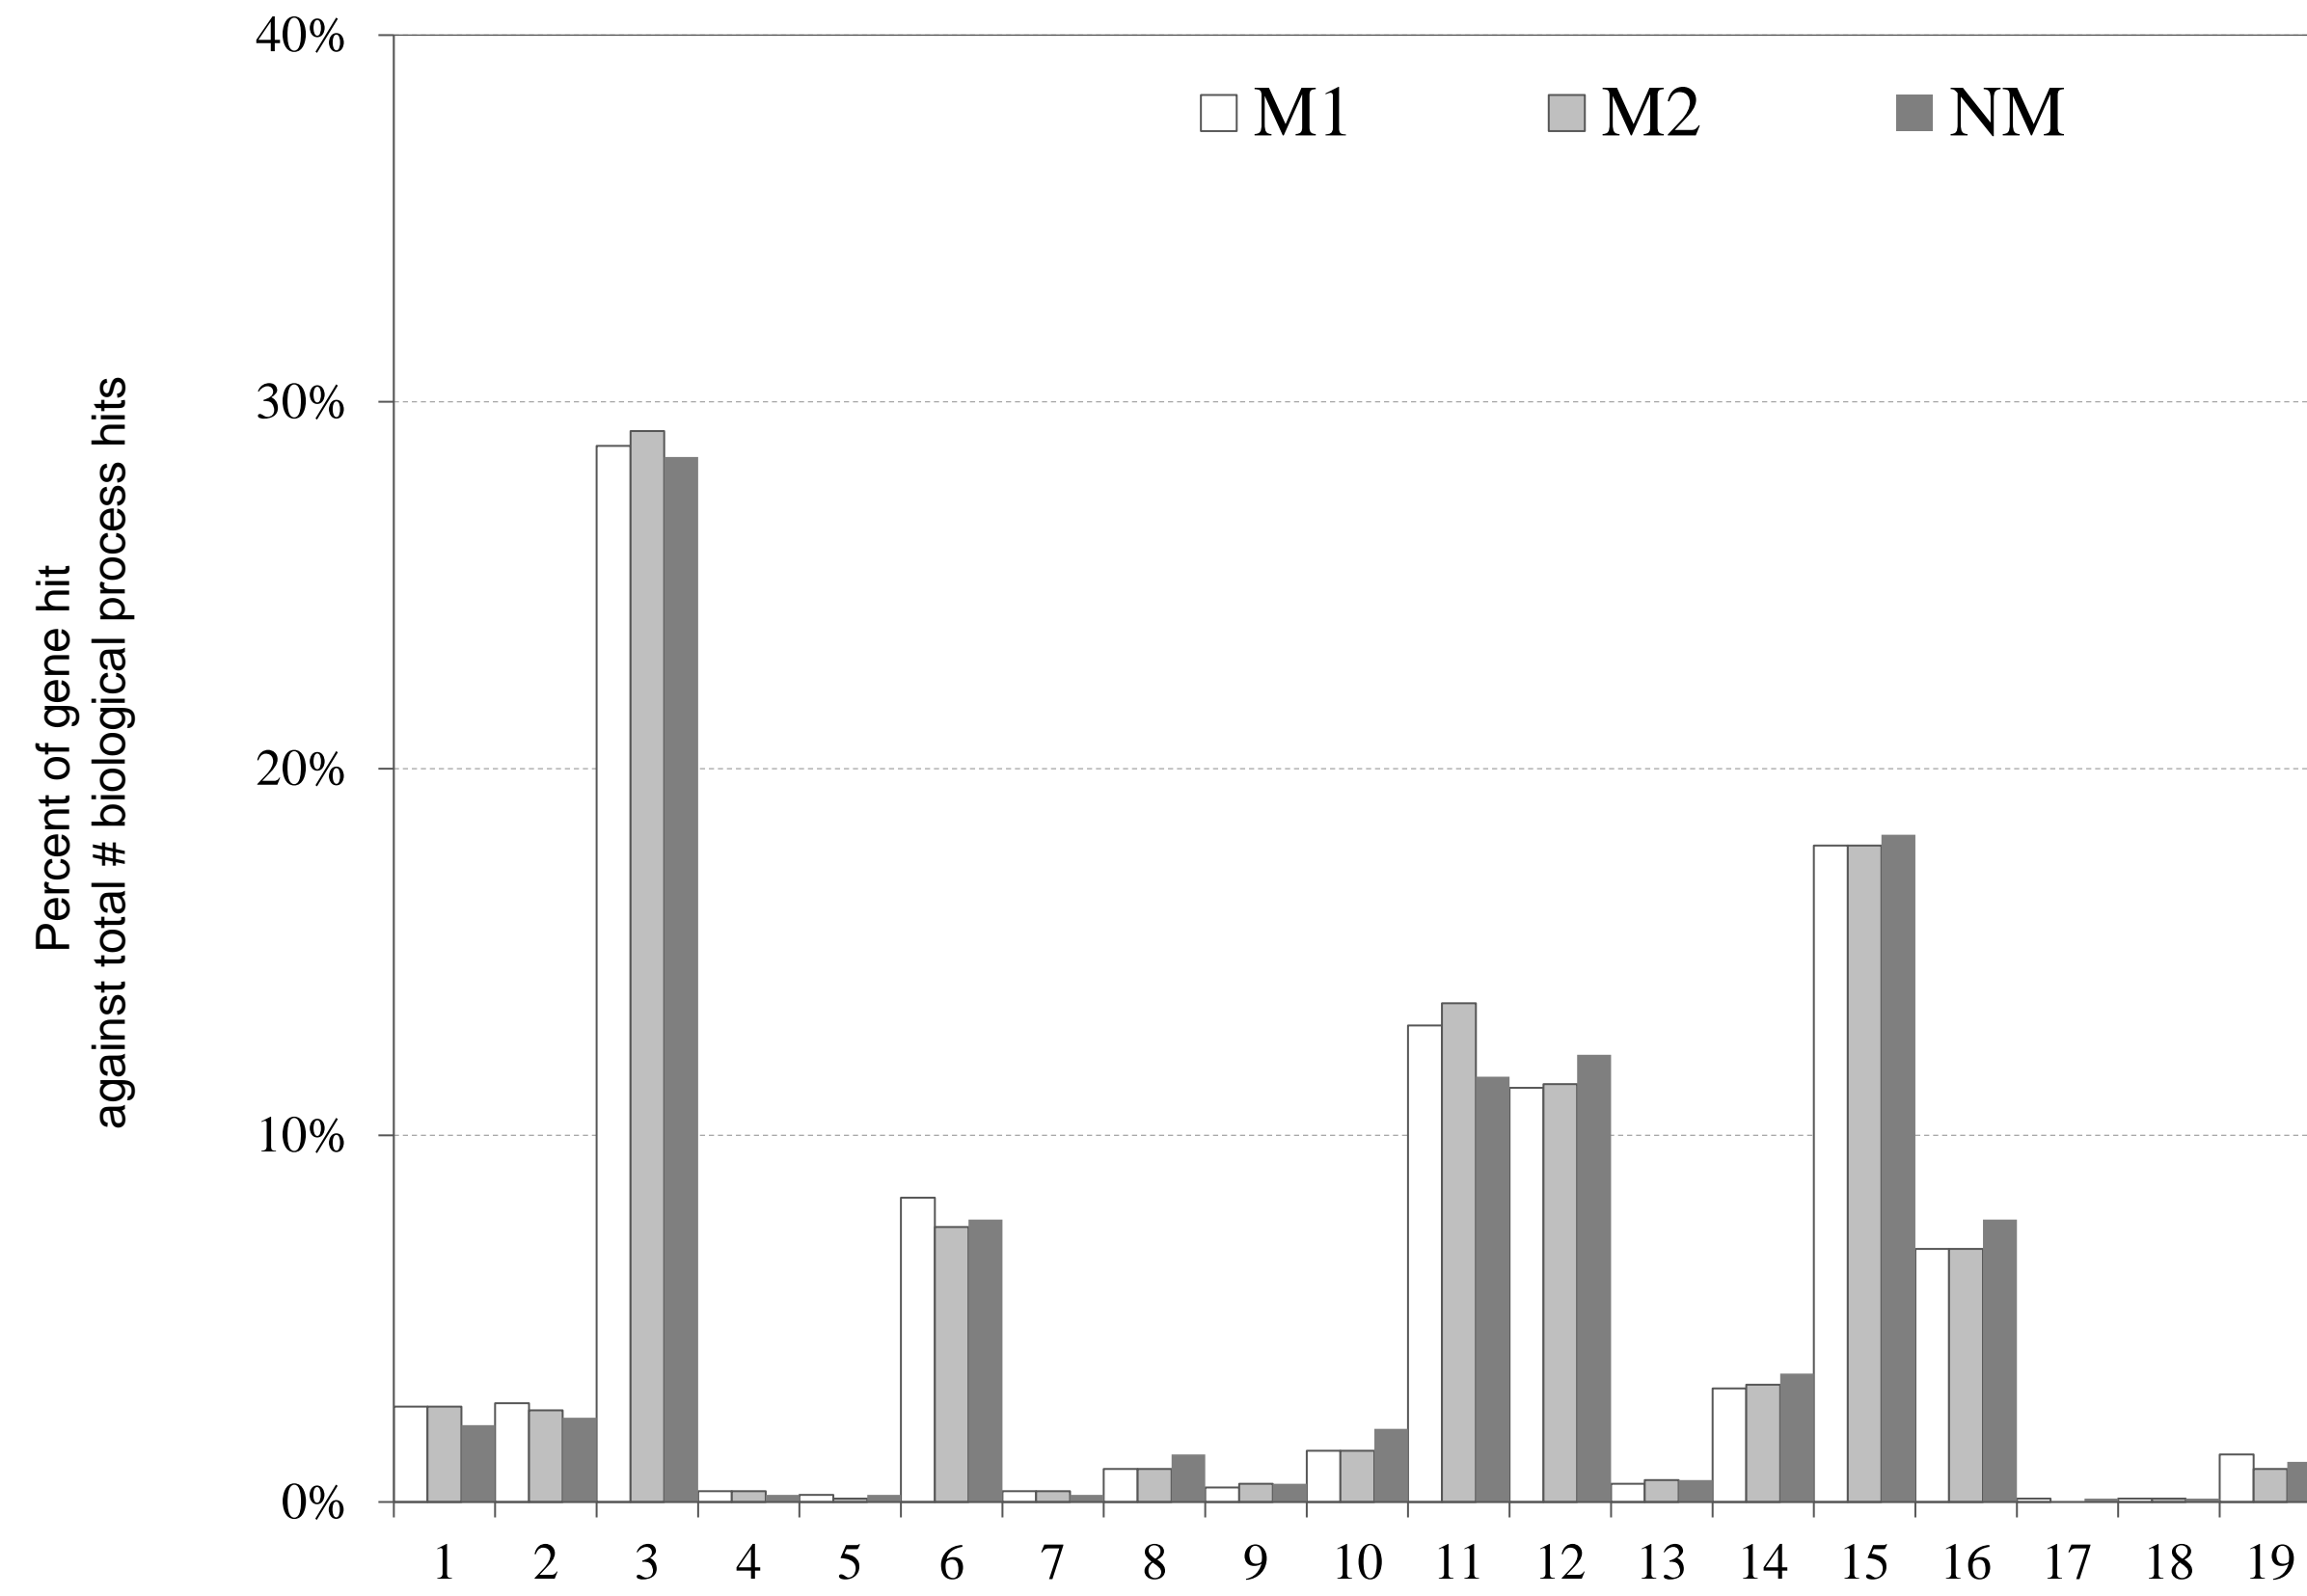

B

GO Molecular function

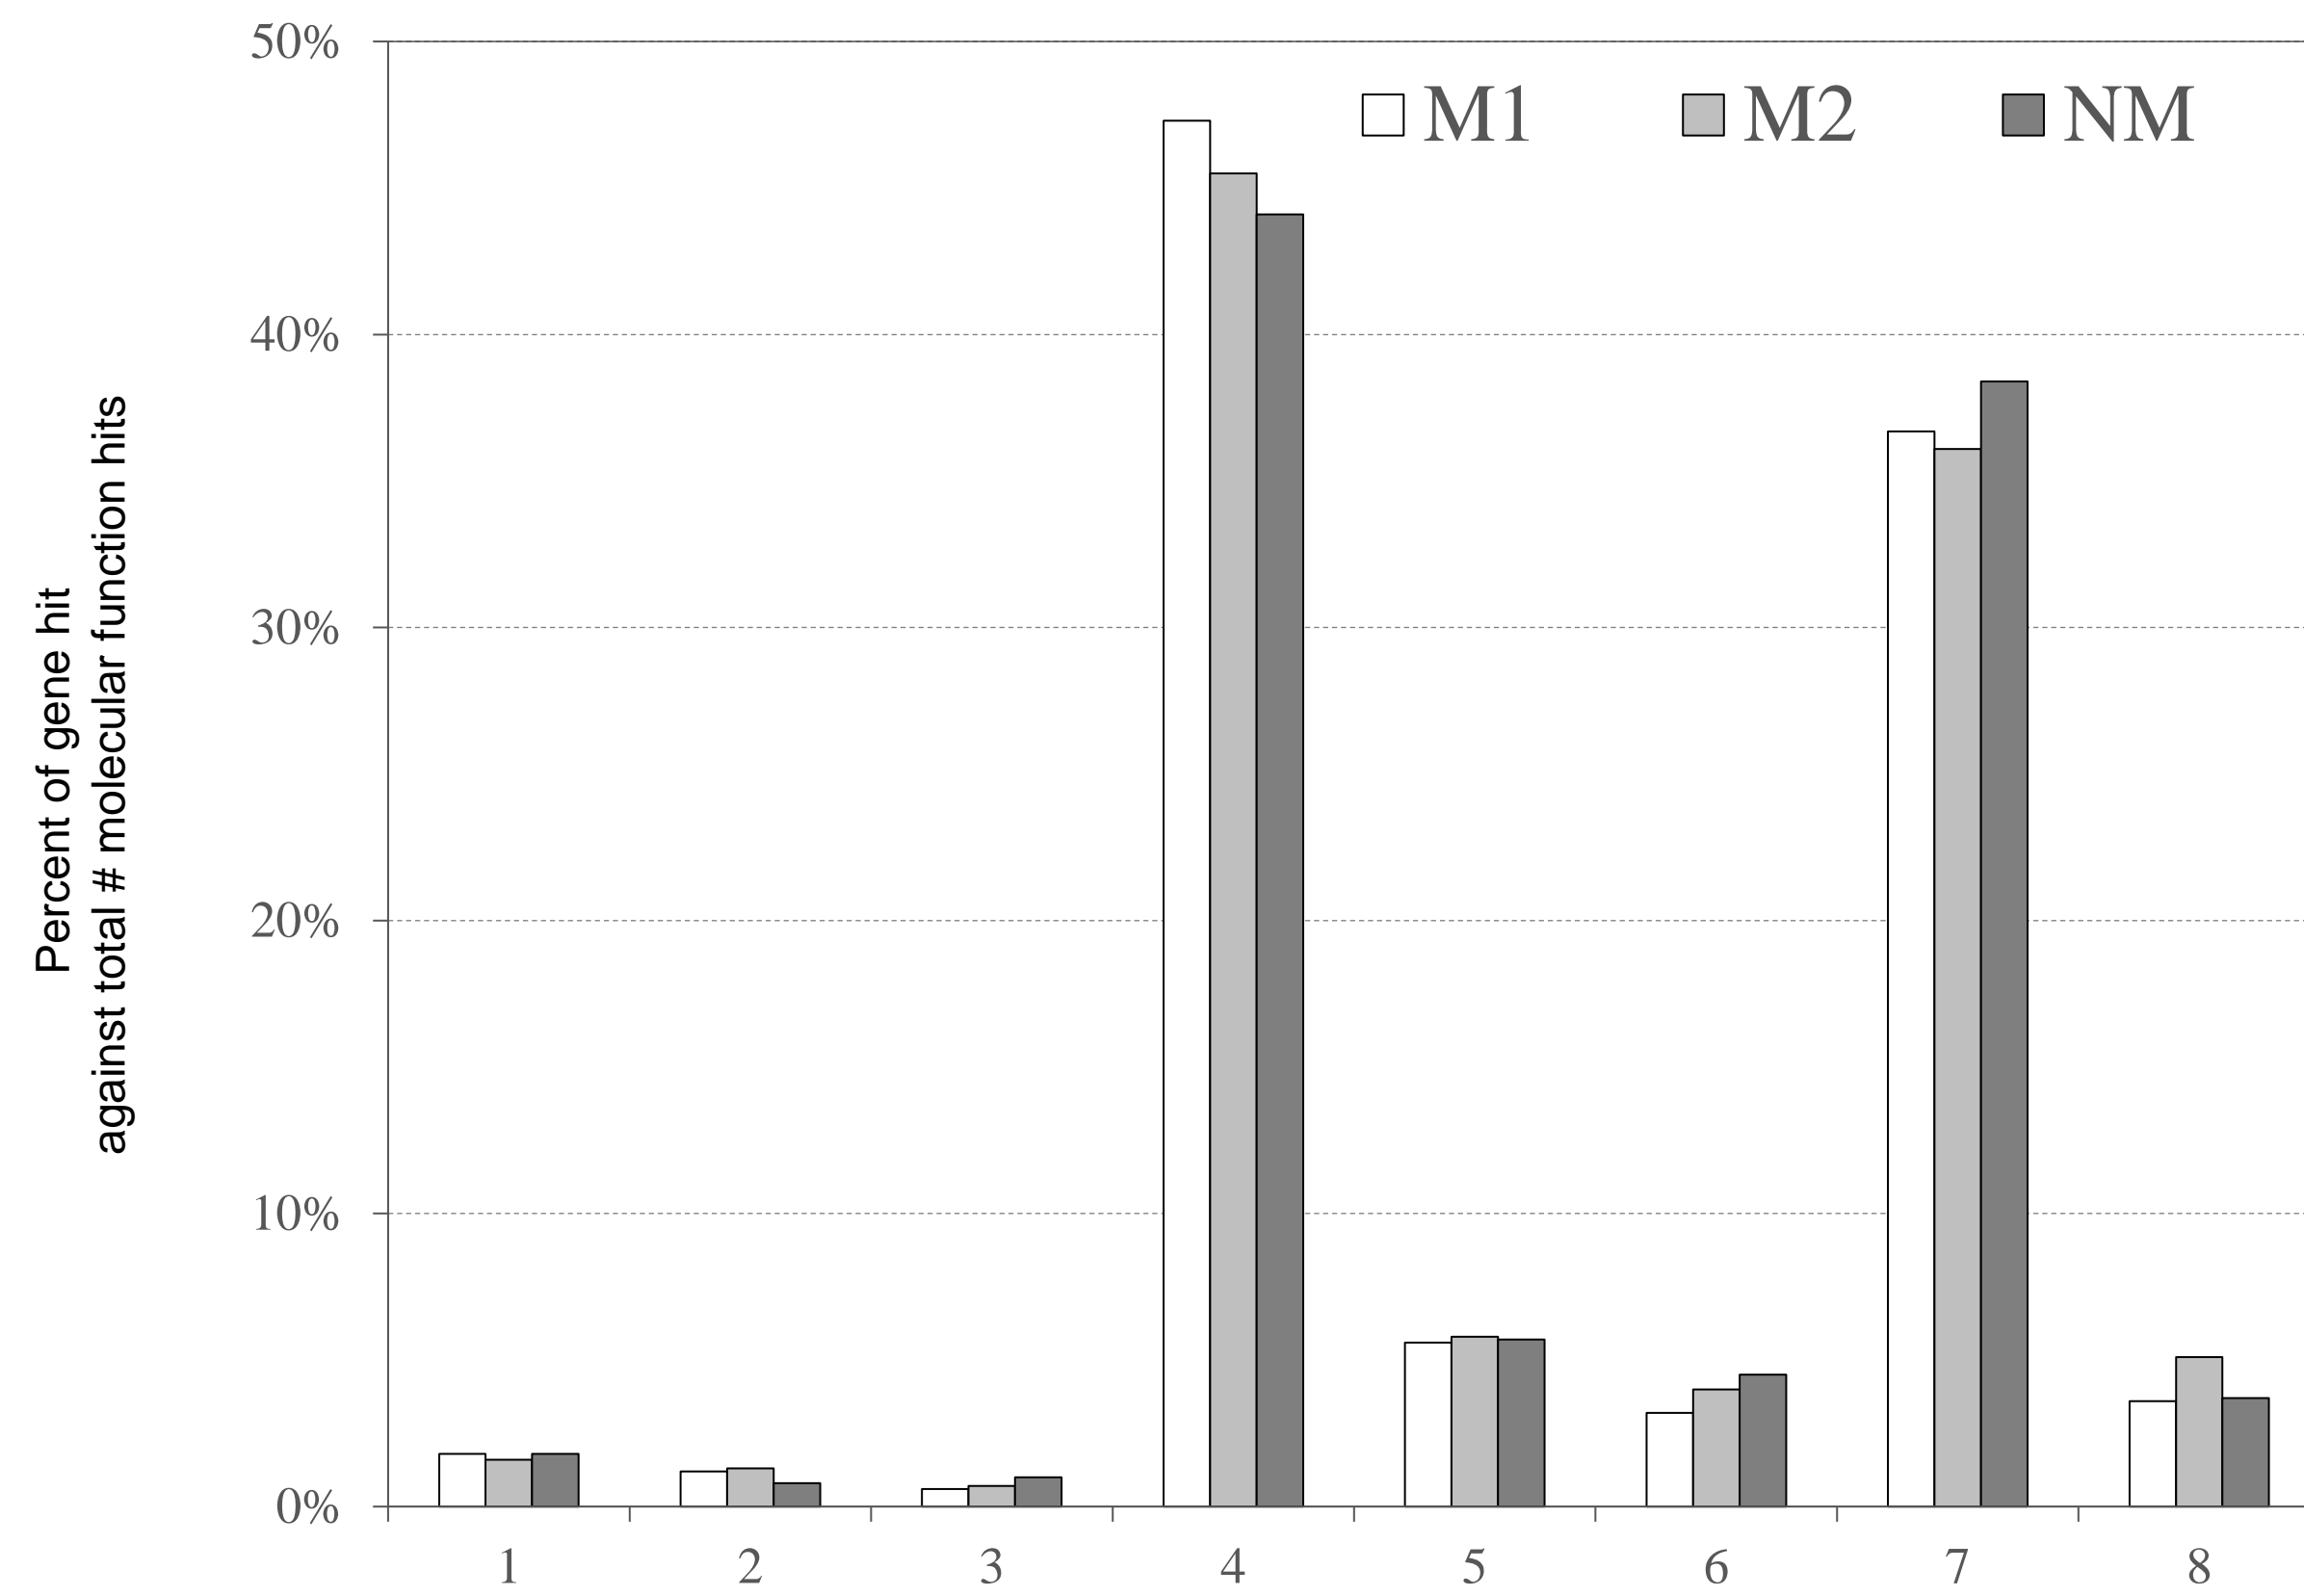

C

GO Cellular component

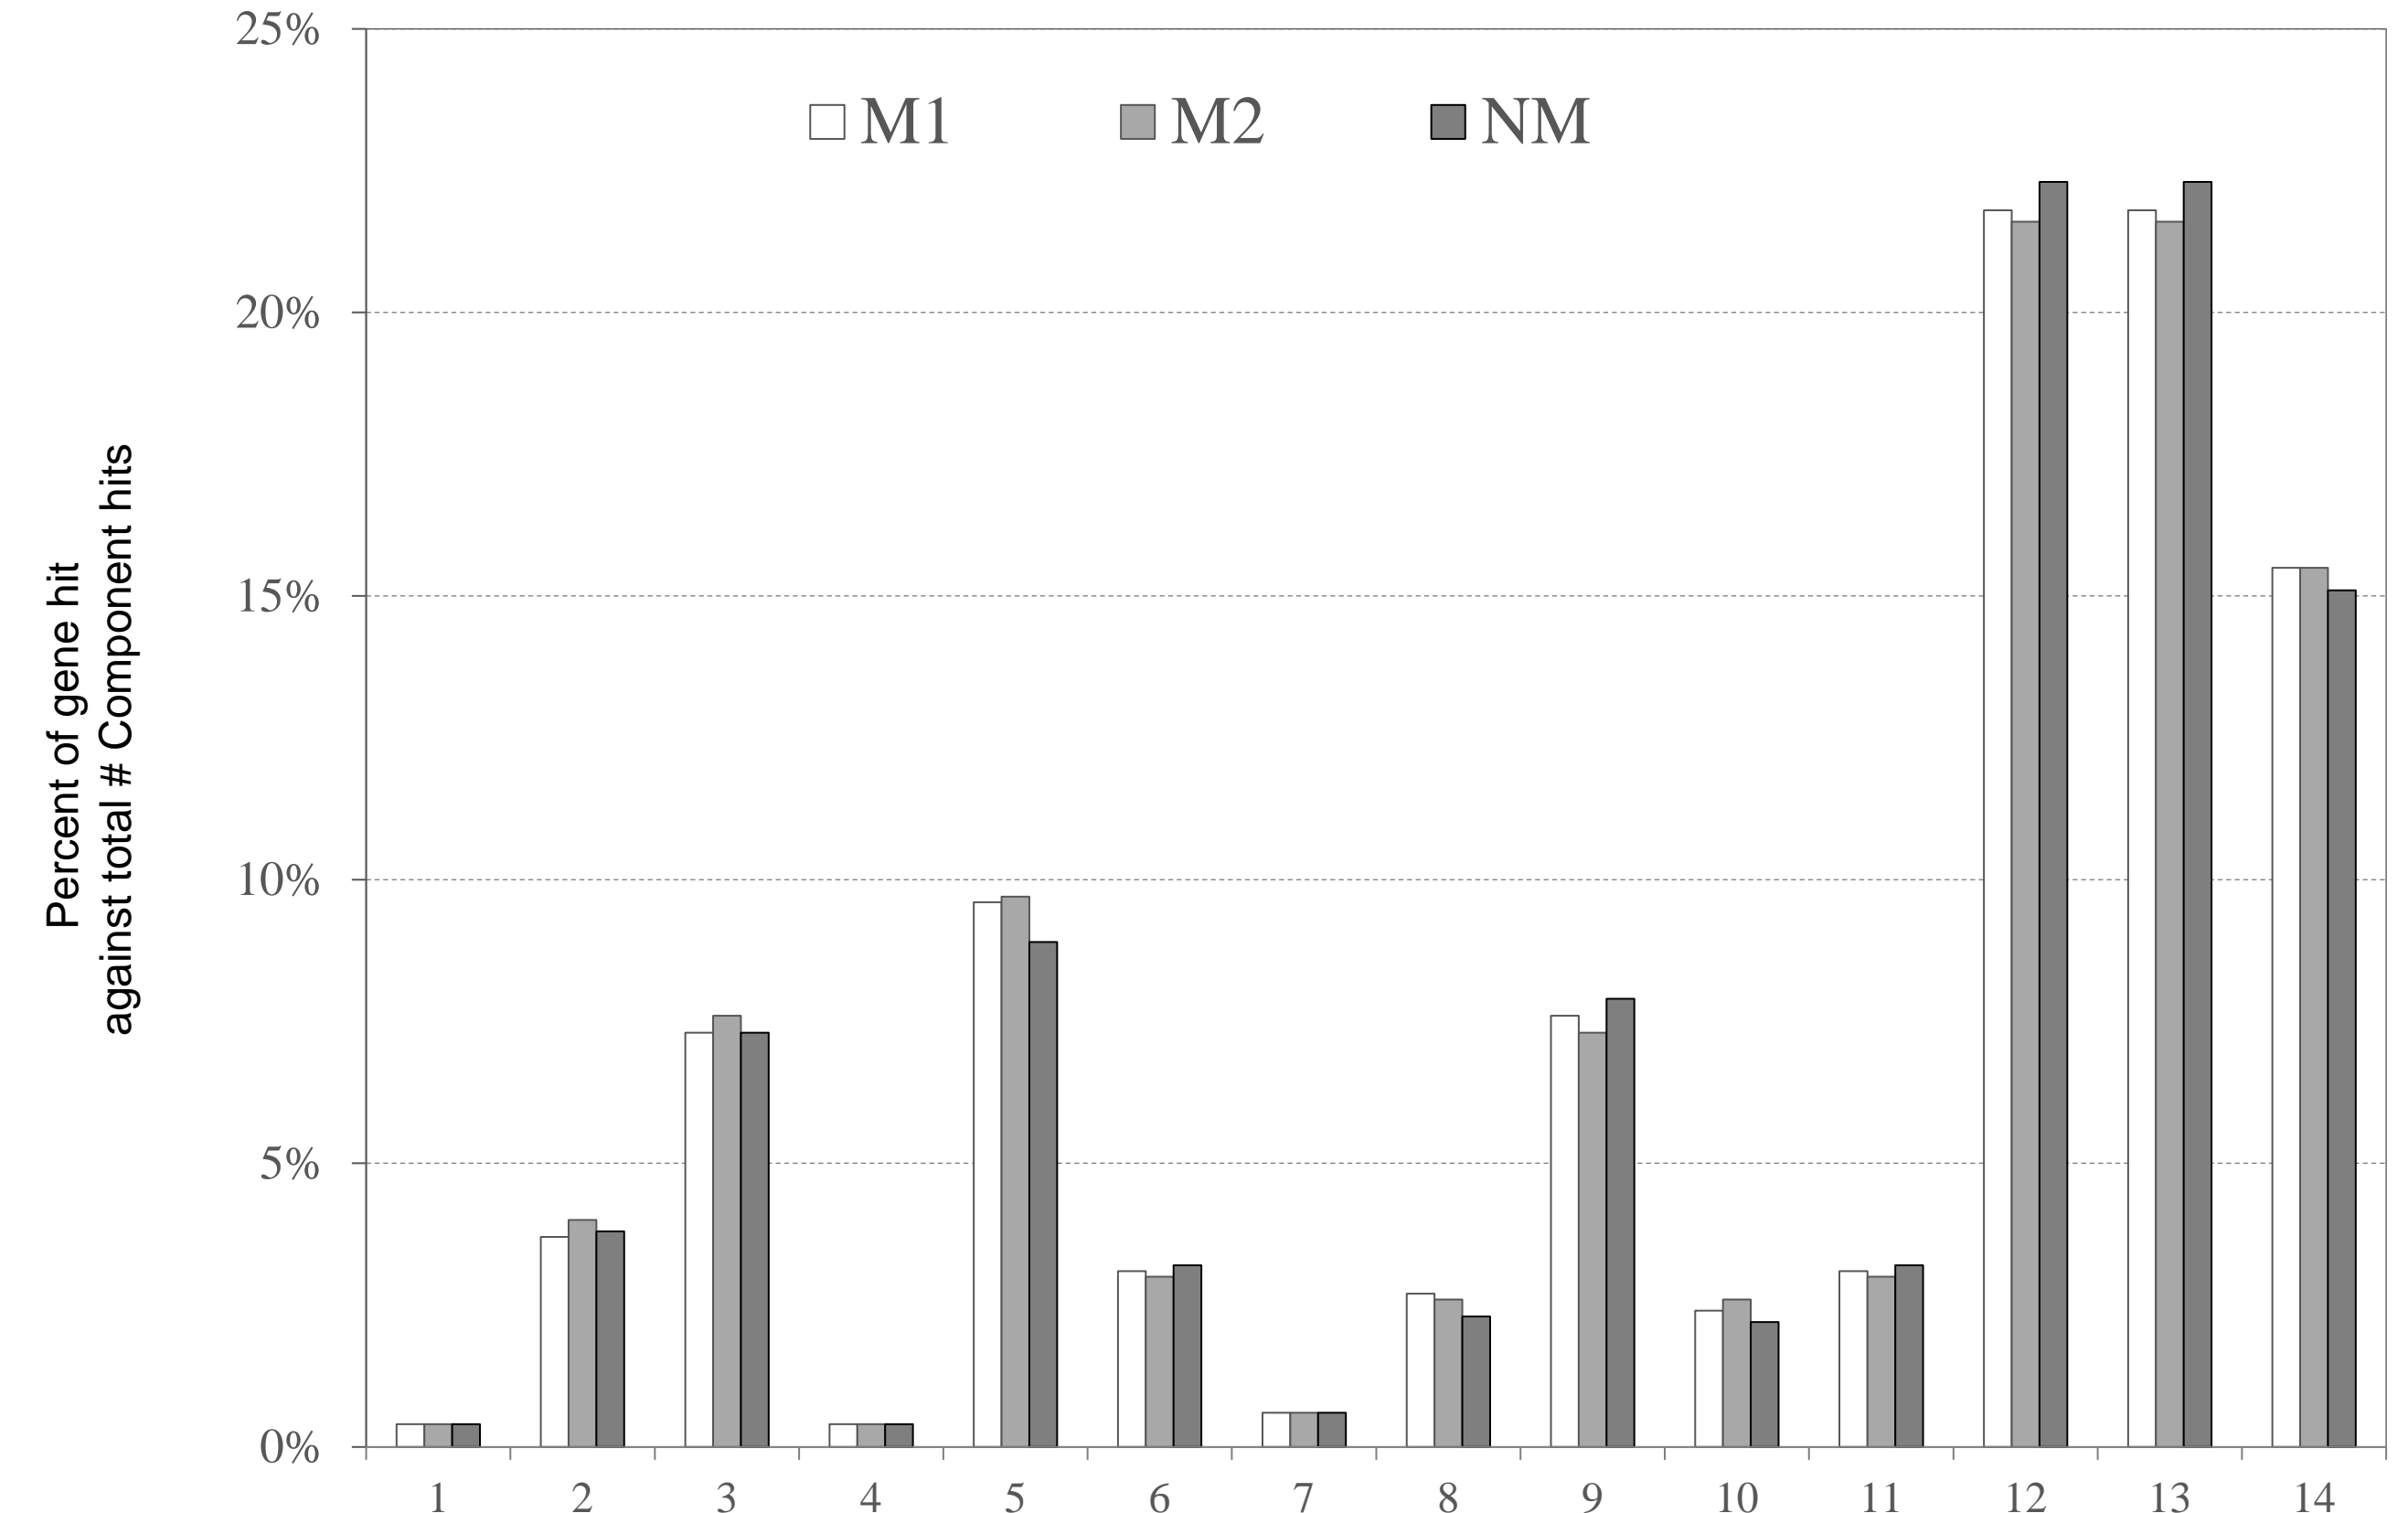

D

GO Protein class

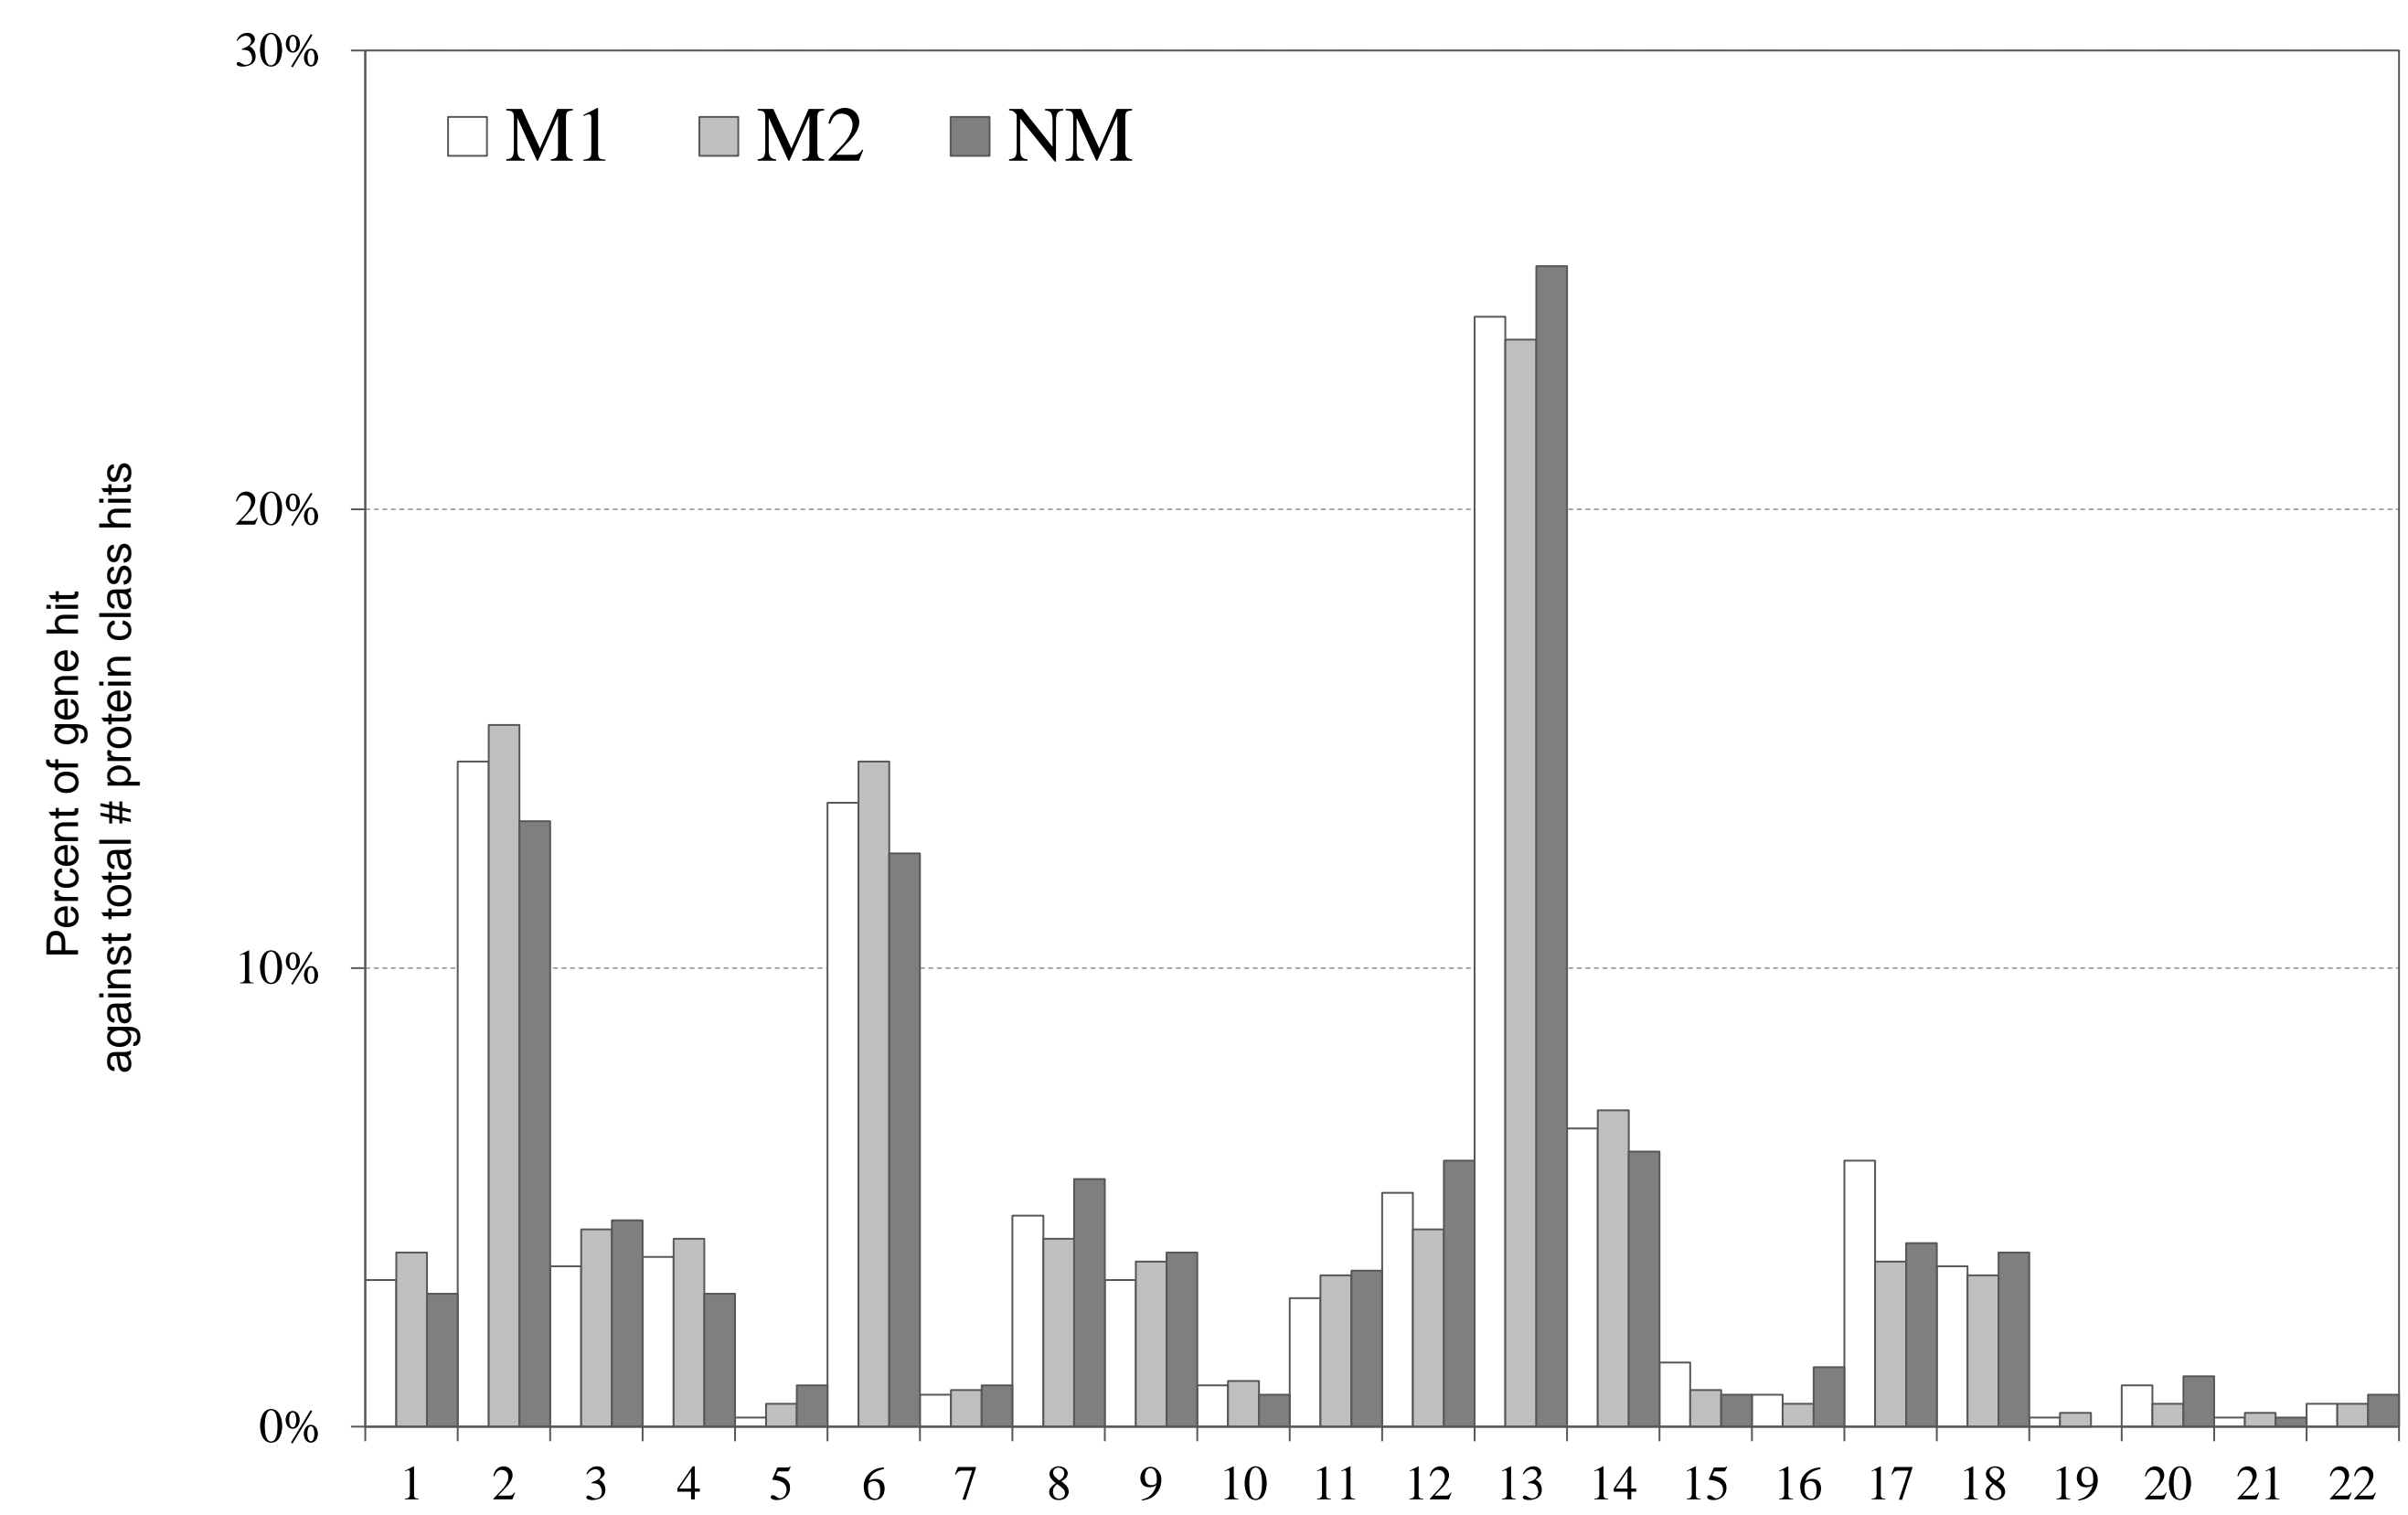

# Figure S2.

Relationship between module eigen proteins and the L858R and Ex19del mutations in the *EGFR* gene. Each row in the embedded table represents weighted gene co-expression network analysis results for each module. The first and second columns in the table represent module ID and colour name of the module. The third column represents the number of proteins in each module. The fourth, fifth and sixth (seventh, eighth and ninth) columns indicate the correlation coefficients ( $p$ -values of the correlation coefficients) between the corresponding modules and the clinical traits. The table is colour-coded by correlation coefficient according to the colour legend on the right side of the figure. The intensity and direction of the correlations are indicated on the right side of the heatmap (red, positive correlation; blue, negative correlation).  $p$ -values ( $< 0.10$ ) are highlighted in red.

| Module ID | Module colour | # of mutant proteins in the module | Module trait relationship |                        |                        |                        |                        |                        |
|-----------|---------------|------------------------------------|---------------------------|------------------------|------------------------|------------------------|------------------------|------------------------|
|           |               |                                    | trait M1 (correlation)    | trait M2 (correlation) | trait NM (correlation) | trait M1 ( $p$ -value) | trait M2 ( $p$ -value) | trait NM ( $p$ -value) |
| WM1       | darkgreen     | 32                                 | 0.1065                    | -0.1390                | 0.0281                 | 0.5363                 | 0.4187                 | 0.8706                 |
| WM2       | yellow        | 63                                 | 0.1971                    | 0.1282                 | -0.2817                | 0.2492                 | 0.4561                 | 0.0960                 |
| WM3       | black         | 55                                 | 0.1631                    | 0.0680                 | -0.2001                | 0.3418                 | 0.6937                 | 0.2419                 |
| WM4       | red           | 58                                 | -0.0976                   | -0.0976                | 0.1690                 | 0.5712                 | 0.5712                 | 0.3244                 |
| WM5       | cyan          | 38                                 | -0.1372                   | 0.1920                 | -0.0475                | 0.4251                 | 0.2619                 | 0.7832                 |
| WM6       | blue          | 77                                 | -0.1372                   | 0.4115                 | -0.2376                | 0.4251                 | 0.0127                 | 0.1630                 |
| WM7       | pink          | 54                                 | 0.0510                    | -0.1335                | 0.0714                 | 0.7675                 | 0.4378                 | 0.6791                 |
| WM8       | green         | 63                                 | -0.1636                   | 0.1443                 | 0.0167                 | 0.3405                 | 0.4010                 | 0.9232                 |
| WM9       | tan           | 41                                 | -0.0976                   | -0.0976                | 0.1690                 | 0.5712                 | 0.5712                 | 0.3244                 |
| WM10      | turquoise     | 81                                 | 0.2928                    | -0.0976                | -0.1690                | 0.0831                 | 0.5712                 | 0.3244                 |
| WM11      | salmon        | 39                                 | -0.0976                   | -0.0976                | 0.1690                 | 0.5712                 | 0.5712                 | 0.3244                 |
| WM12      | royalblue     | 34                                 | 0.2928                    | -0.0976                | -0.1690                | 0.0831                 | 0.5712                 | 0.3244                 |
| WM13      | purple        | 46                                 | -0.0976                   | -0.0976                | 0.1690                 | 0.5712                 | 0.5712                 | 0.3244                 |
| WM14      | midnightblue  | 37                                 | 0.2928                    | -0.0976                | -0.1690                | 0.0831                 | 0.5712                 | 0.3244                 |
| WM15      | magenta       | 48                                 | -0.0976                   | -0.0976                | 0.1690                 | 0.5712                 | 0.5712                 | 0.3244                 |
| WM16      | lightyellow   | 35                                 | -0.0976                   | -0.0976                | 0.1690                 | 0.5712                 | 0.5712                 | 0.3244                 |
| WM17      | lightgreen    | 36                                 | -0.0976                   | 0.2928                 | -0.1690                | 0.5712                 | 0.0831                 | 0.3244                 |
| WM18      | lightcyan     | 37                                 | -0.0976                   | -0.0976                | 0.1690                 | 0.5712                 | 0.5712                 | 0.3244                 |
| WM19      | grey60        | 37                                 | -0.0976                   | -0.0976                | 0.1690                 | 0.5712                 | 0.5712                 | 0.3244                 |
| WM20      | greenyellow   | 44                                 | -0.0976                   | -0.0976                | 0.1690                 | 0.5712                 | 0.5712                 | 0.3244                 |
| WM21      | darkturquoise | 31                                 | -0.0976                   | -0.0976                | 0.1690                 | 0.5712                 | 0.5712                 | 0.3244                 |
| WM22      | brown         | 74                                 | 0.2928                    | -0.0976                | -0.1690                | 0.0831                 | 0.5712                 | 0.3244                 |
| WM23      | darkred       | 32                                 | -0.0976                   | -0.0976                | 0.1690                 | 0.5712                 | 0.5712                 | 0.3244                 |

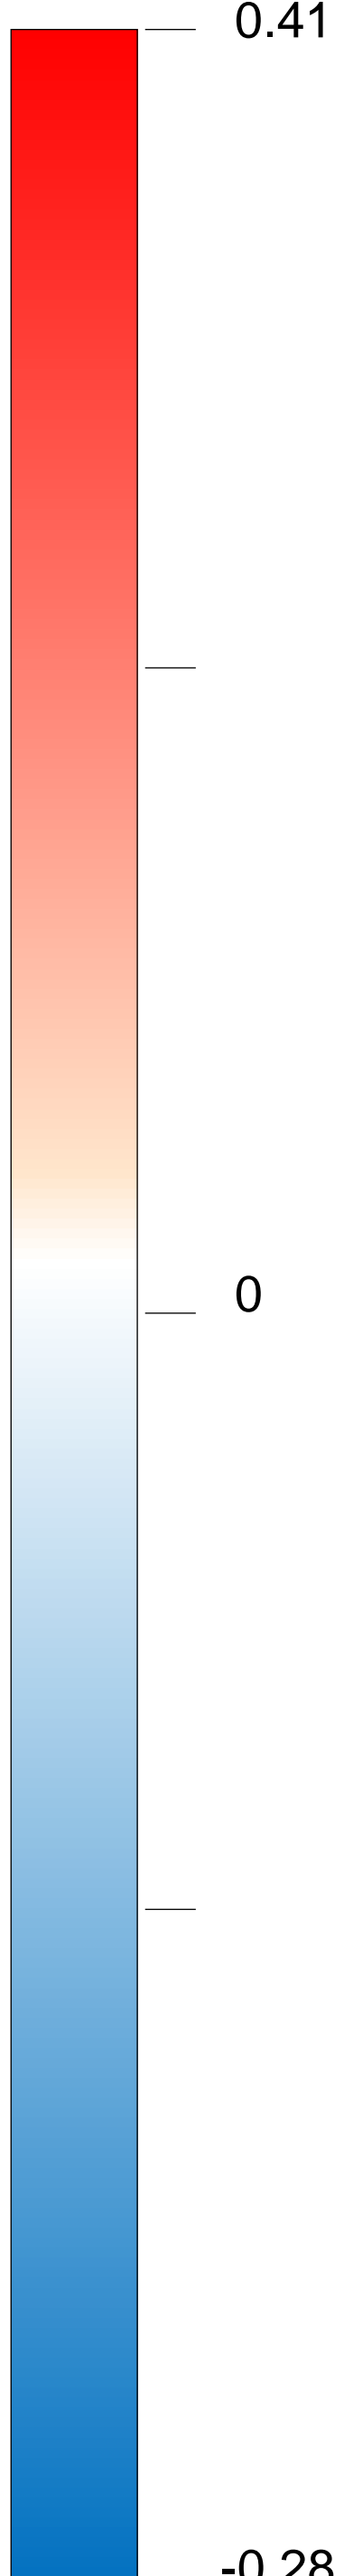

Figure S3

$R_{SC}$  values between M1 and M2 calculated for proteins identified (X-axis). Mutant proteins upregulated with twice fold changes for M1 ( $R_{SC} \geq 1$ ) and M2 ( $R_{SC} \leq -1$ ) are denoted.

Fold change in  $\log_2(R_{SC})$ , M1 vs M2

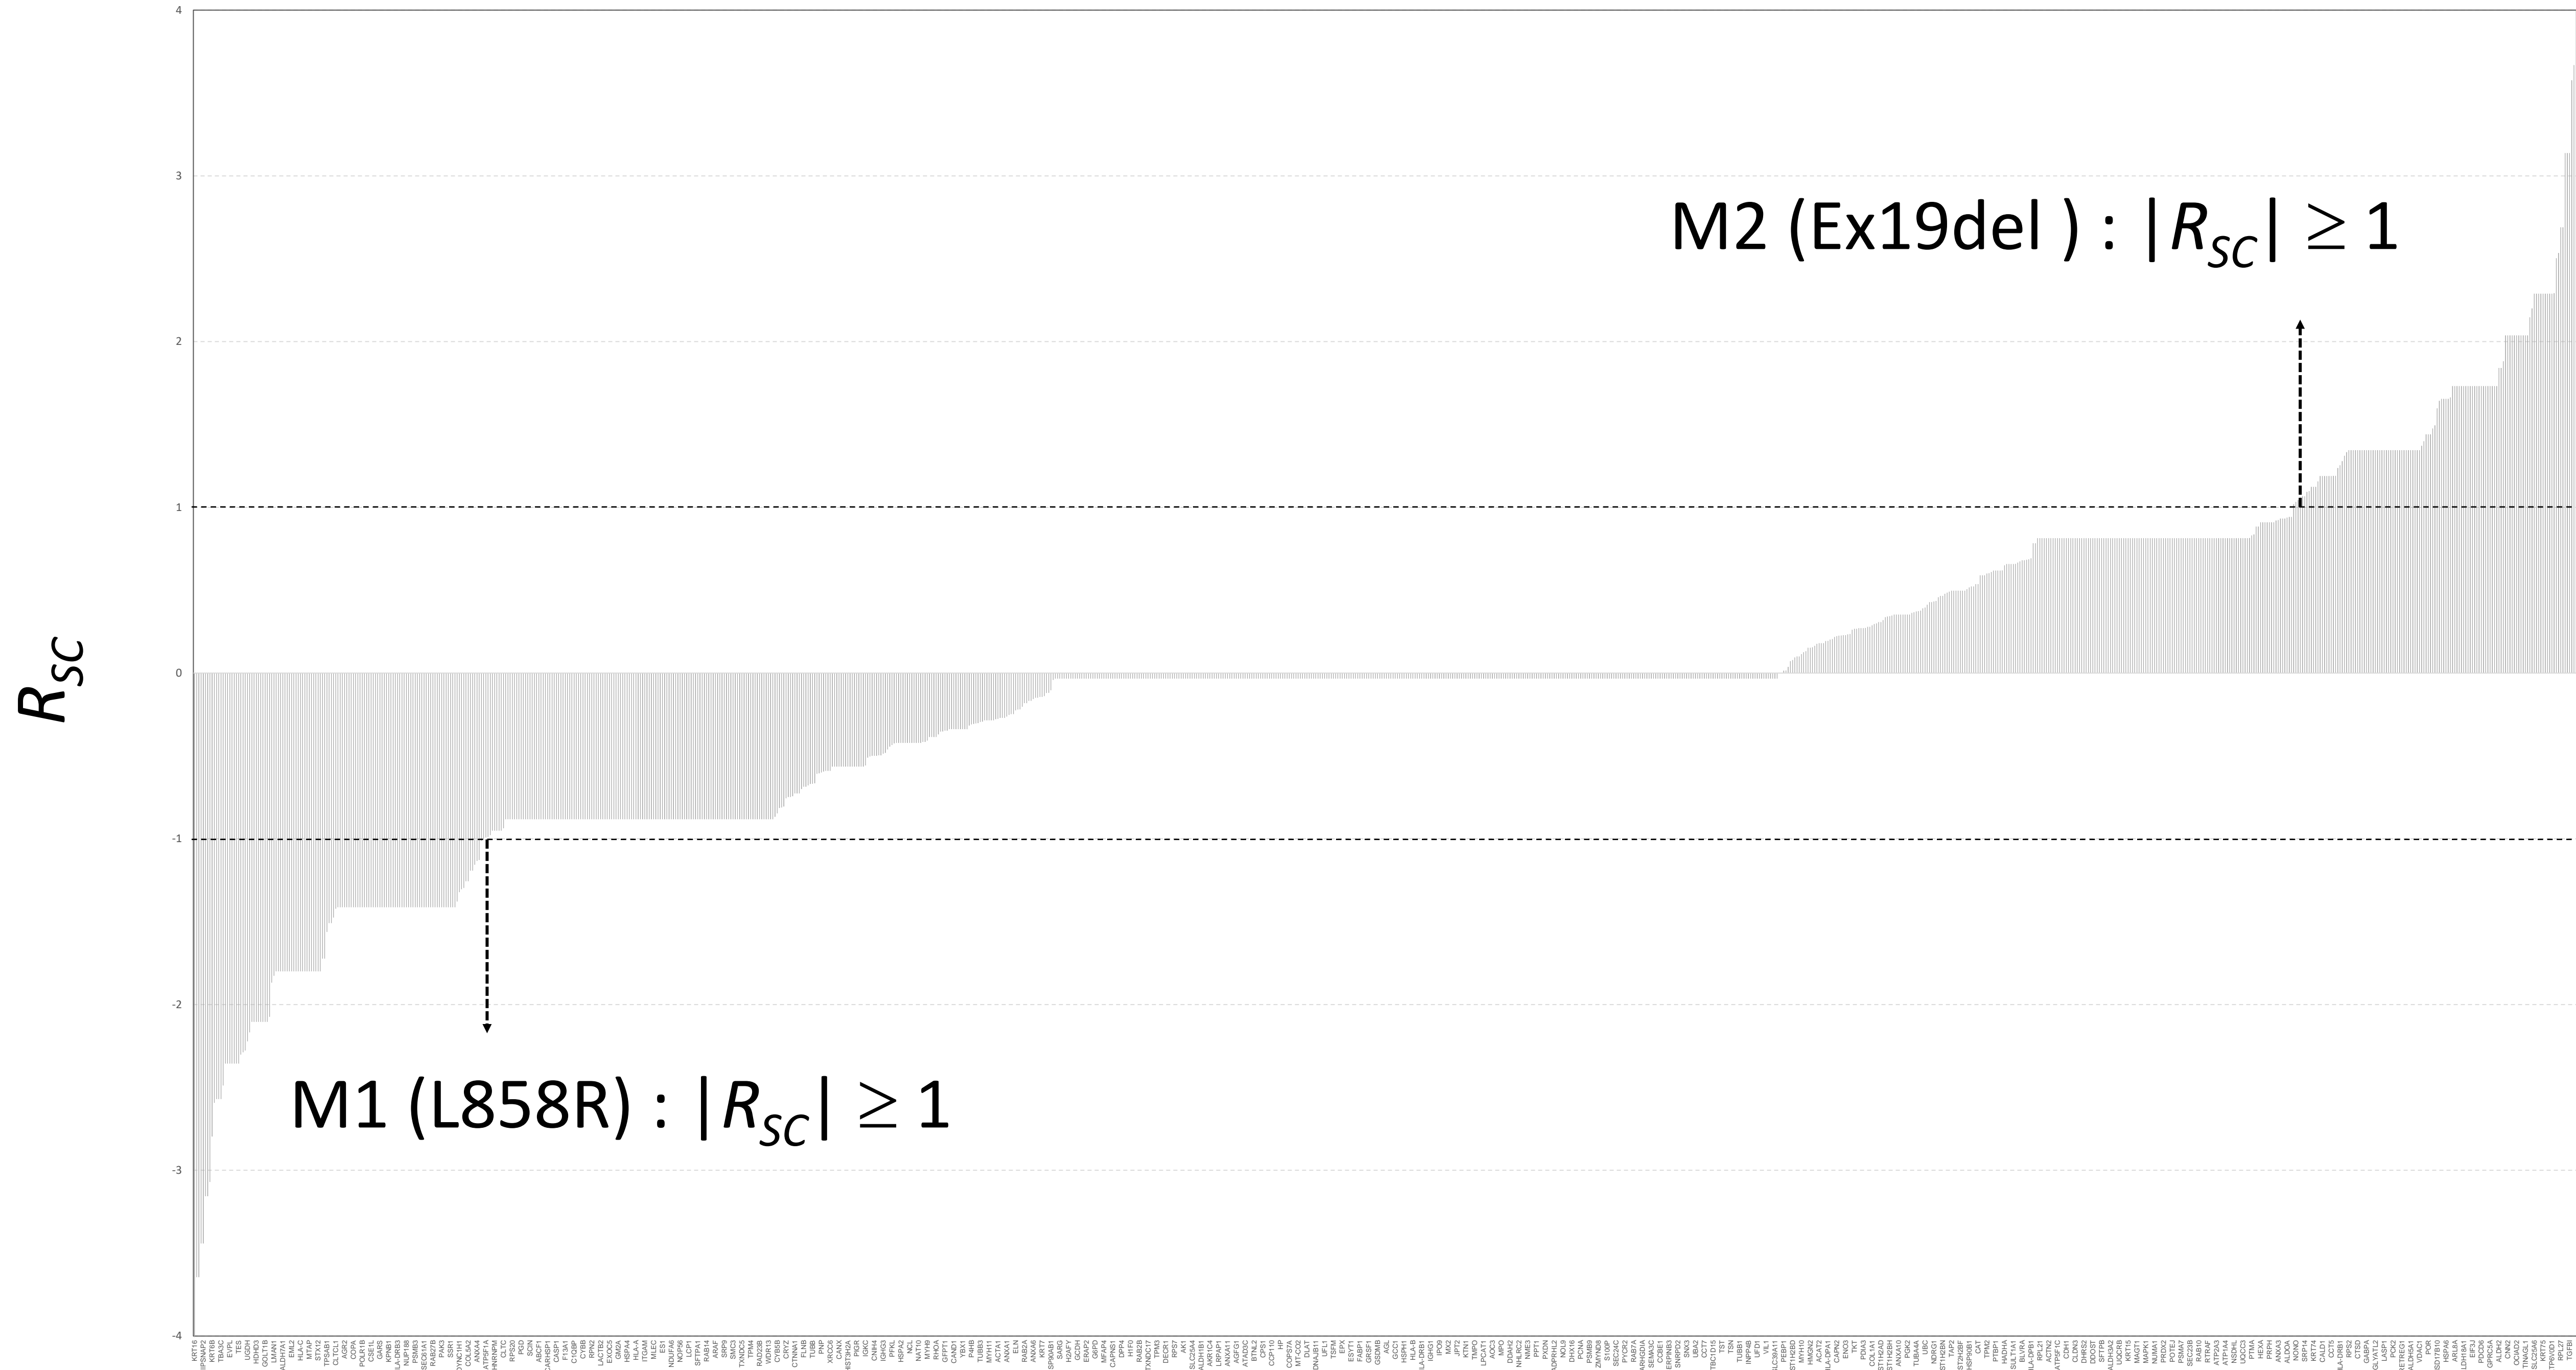

← 1,100 mutant proteins identified →

Table S1.

The comparative analysis results of causal networks predicted by IPA for mutant proteins expressed commonly (see Venn map in Fig. 2A). *MNK1/2*, *Max-Myc*, *MYC*, *XBP1*, *BTG2*, *F8*, *STK11*, and *RAD21* were highly activated (z-score > 2.5) and differentially under M1 (L858R).

| Causal Networks                | Depth | Activation z-score |              |                       |
|--------------------------------|-------|--------------------|--------------|-----------------------|
|                                |       | M1 (L858R)         | M2 (Ex19del) | NM (no L858R/Ex19del) |
| <i>MNK1/2</i>                  | 2     | 3.727              | 1.091        | 0.853                 |
| <i>Max-Myc</i>                 | 3     | 3.077              | 0.302        | 0.832                 |
| <i>MYC</i>                     | 2     | 2.73               | -0.164       | -0.438                |
| <i>XBP1</i>                    | 1     | 2.646              | 1.342        | 0                     |
| <i>BTG2</i>                    | 2     | 2.53               | 0.816        | 1.134                 |
| <i>F8</i>                      | 2     | 2.53               | 0.447        | 1.342                 |
| <i>STK11</i>                   | 1     | 2.53               | 0.447        | 1.414                 |
| <i>RAD21</i>                   | 2     | 2.53               | 0.655        | 0.626                 |
| bardoxolone methyl             | 2     | 2.38               | 1.257        | 1                     |
| <i>CAB39</i>                   | 2     | 2.309              | 0            | 1                     |
| <i>BIRC5</i>                   | 2     | 2.216              | 1.061        | -0.149                |
| <i>PCGEM1</i>                  | 3     | 2.151              | -0.493       | -0.729                |
| tamoxifen                      | 2     | 2.138              | 1.029        | 1.372                 |
| <i>PCGEM1</i>                  | 2     | 2.03               | 0.447        | 0                     |
| <i>MXD1</i>                    | 2     | -2.111             | 0            | 0.426                 |
| bivalirudin                    | 2     | -2.138             | -1.414       | -1.414                |
| argatroban                     | 2     | -2.138             | -1.414       | -1.414                |
| <i>PFDN5</i>                   | 3     | -2.157             | 0            | -0.802                |
| <i>FBXO32</i>                  | 2     | -2.188             | -0.784       | -1.177                |
| macitentan                     | 2     | -2.236             | -1.342       | -1.342                |
| N-Ac-leucyl-leucyl-methioninal | 2     | -2.236             | -0.816       | -0.447                |
| ciprofloxacin                  | 1     | -2.236             | -1           | -1                    |
| <i>FBXL14</i>                  | 3     | -2.278             | -0.143       | 1.336                 |
| <i>IgG</i>                     | 1     | -2.333             | -0.447       | -1.342                |
| <i>PUF60</i>                   | 2     | -2.343             | -0.447       | -0.218                |
| <i>LONP1</i>                   | 1     | -2.449             | -1.414       | -1.414                |
| <i>FBXL14</i>                  | 2     | -2.534             | -0.816       | -0.2                  |
| <i>PUF60</i>                   | 3     | -2.593             | 0.164        | 0.438                 |
| dihydromorphine                | 3     | -2.654             | -0.392       | -1.225                |
| <i>SGI 1776</i>                | 2     | -2.777             | -1.091       | -0.626                |
| <i>PPP2R2B</i>                 | 3     | -3.444             | -0.762       | -0.283                |
